# Supplementary material for: Novel Esomeprazole Magnesium-Loaded Dual-Release Mini-Tablet Polycap: Formulation, Optimization, Characterization, and In Vivo Evaluation in Beagle Dogs
Source: MDPI journal article supplement (doi:10.3390/pharmaceutics14071411), 2022-07-05
Supplement: s1 [file s1]

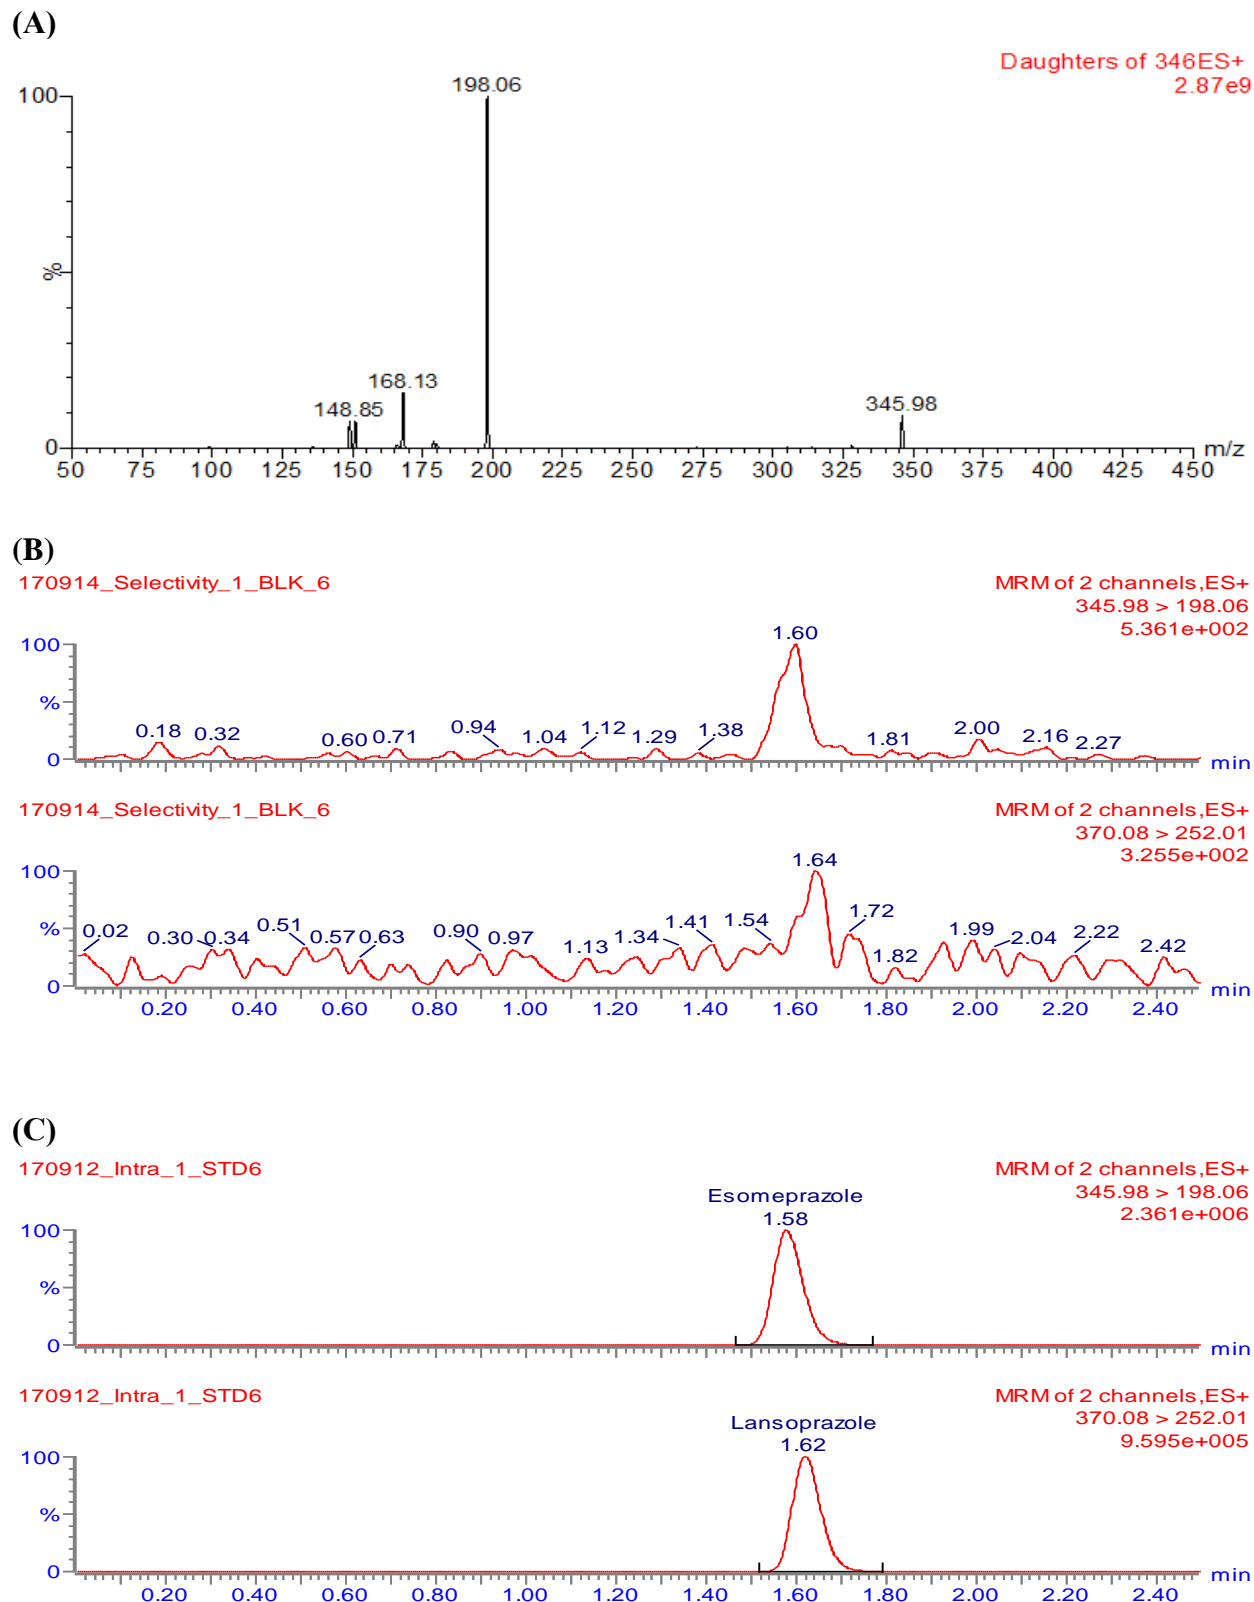

**Figure S1.** (A) MS/MS spectrum of Esomeprazole. (Esomeprazole with monitoring at  $m/z$  346  $\rightarrow$  198). (B) LC-MS/MS chromatogram of blank Beagle dogs' plasma. (C) LC-MS/MS chromatogram of Esomeprazole in standard plasma (500 ng/mL).

**Table S1.** Calibration curve validation data for Esomeprazole (n = 4)

|      | Nominal conc.<br>(ng/mL) | Calculated Conc (ng/mL) |          |          |          | Mean     | Accuracy of Mean (%) | Precision of mean (C.V., %) |
|------|--------------------------|-------------------------|----------|----------|----------|----------|----------------------|-----------------------------|
|      |                          | Intra                   | Inter 1  | Inter 2  | Inter 3  |          |                      |                             |
| STD1 | 1                        | 1.019                   | 1.022    | 0.997    | 1.021    | 1.015    | 101.5                | 1.2                         |
| STD2 | 5                        | 4.649                   | 4.564    | 5.365    | 4.806    | 4.846    | 96.9                 | 7.4                         |
| STD3 | 10                       | 9.495                   | 9.532    | 8.998    | 8.877    | 9.226    | 92.3                 | 3.6                         |
| STD4 | 50                       | 47.751                  | 47.499   | 46.736   | 43.800   | 46.447   | 92.9                 | 3.9                         |
| STD5 | 100                      | 103.112                 | 106.676  | 99.940   | 99.796   | 102.381  | 102.4                | 3.2                         |
| STD6 | 500                      | 526.607                 | 537.301  | 524.601  | 531.591  | 530.025  | 106.0                | 1.1                         |
| STD7 | 1000                     | 1055.594                | 1036.810 | 1040.007 | 1100.732 | 1058.286 | 105.8                | 2.8                         |
| STD8 | 5000                     | 5030.745                | 4917.945 | 5036.044 | 5459.656 | 5111.098 | 102.2                | 4.7                         |

**Table S2.** Accuracy & precision validation data for Esomeprazole (Intra: n = 5, Inter: n = 4)

| Nominal conc.<br>(ng/mL) | Accuracy (%) |       | Precision (C.V., %) |       |
|--------------------------|--------------|-------|---------------------|-------|
|                          | Intra        | Inter | Intra               | Inter |
| 1                        | 107.5        | 109.2 | 10.1                | 1.7   |
| 3                        | 97.9         | 106.6 | 3.9                 | 6.4   |
| 800                      | 106.1        | 107.6 | 0.8                 | 3.6   |
| 4000                     | 105.4        | 105.1 | 1.3                 | 1.8   |

**Table S3.** Recovery validation data for Esomeprazole (n = 3).

| Number            | Esomeprazole  |       |                    |       |                   |        | Lansoprazole      |       |
|-------------------|---------------|-------|--------------------|-------|-------------------|--------|-------------------|-------|
|                   | Low (3 ng/mL) |       | Medium (800 ng/mL) |       | High (4000 ng/mL) |        | ISTD (2000 ng/mL) |       |
|                   | A             | B     | A                  | B     | A                 | B      | C                 | D     |
| 1                 | 0.015         | 0.012 | 4.543              | 3.694 | 20.868            | 17.178 | 0.188             | 0.166 |
| 2                 | 0.014         | 0.012 | 4.468              | 3.476 | 20.497            | 17.049 | 0.188             | 0.168 |
| 3                 | 0.014         | 0.012 | 4.431              | 3.535 | 20.848            | 17.144 | 0.182             | 0.166 |
| Mean              | 0.015         | 0.012 | 4.480              | 3.568 | 20.738            | 17.123 | 0.186             | 0.167 |
| C.V (%)           | 0.01          | 0.01  | 4.46               | 3.53  | 20.69             | 17.11  | 0.19              | 0.17  |
| Mean recovery (%) | 82.0          |       | 79.6               |       | 82.6              |        | 89.6              |       |

A: Unextracted STD peak area / Unextracted ISTD peak area

B: Extracted STD peak area / Unextracted ISTD peak area

C: Unextracted ISTD peak area / Unextracted STD peak area

D: Extracted ISTD peak area / Unextracted STD peak area
